# Supplementary material for: Chemoenzymatic Cascade Synthesis of Optically Pure Alkanoic Acids by Using Engineered Arylmalonate Decarboxylase Variants
Source: PubMed Central journal article supplement (PMC6563808; doi:10.1002/chem.201806339), 2019-03-12
Supplement: CHEM-25-5071-s001.pdf [file CHEM-25-5071-s001.pdf]

# CHEMISTRY

## A **European** Journal

### Supporting Information

#### **Chemoenzymatic Cascade Synthesis of Optically Pure Alkanoic Acids by Using Engineered Arylmalonate Decarboxylase Variants**

Junichi Enoki,<sup>[a]</sup> Carolin Mügge,<sup>[a]</sup> Dirk Tischler,<sup>[a]</sup> Kenji Miyamoto,<sup>[b]</sup> and Robert Kourist\*<sup>[c]</sup>

chem\_201806339\_sm\_miscellaneous\_information.pdf

## **Author Contributions**

J.E. Conceptualization: Equal; Investigation: Lead; Methodology: Lead; Writing – original draft: Lead; Writing – review & editing: Equal

C.M. Conceptualization: Equal; Formal analysis: Lead; Writing – original draft: Supporting; Writing – review & editing: Supporting

D.T. Writing – review & editing: Supporting

K.M. Conceptualization: Supporting; Writing – original draft: Supporting

R.K. Conceptualization: Lead; Data curation: Supporting; Formal analysis: Supporting; Investigation: Supporting; Writing – original draft: Lead; Writing – review & editing: Lead.

## Contents

|                                                |     |
|------------------------------------------------|-----|
| Experiments                                    | S2  |
| Table S1                                       | S4  |
| Compound Analytics: $^1\text{H}$ -NMR data     | S5  |
| Compound Analytics: $^{13}\text{C}$ -NMR data  | S8  |
| Compound Analytics: Chiral GC-FID chromatogram | S11 |
| References                                     | S13 |

## Synthesis of 2-methyl-2-alkenylmalonic acids **1**

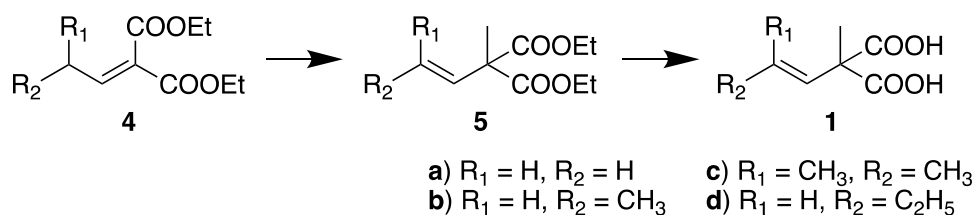

Diethyl ethylidenemalonate **4a** was purchased from a chemical supplier abcr (Karlsruhe, Germany). The other diethyl alkylidenemalonates **4b-d** were synthesized by standard Knoevenagel condensation reactions.

Diethyl 2-methyl-2-vinylmalonate **5a** was prepared according to a procedure described in literature.<sup>1</sup> Lithium diisopropyl amine (LDA) was generated by the addition of *n*-butyl lithium (1.6 M in hexane, 9.6 mmol) into anhydrous THF (20 mL) and diisopropylamine (11 mmol) at -78°C under N<sub>2</sub> atmosphere. After 10 min, *N,N'*-dimethylpropyleneurea (10 mL) and substrate **4a** (5.4 mmol) was added and the reaction solution was stirred for additional 45 min at -78°C. Iodomethane (8 mmol) was then applied and the reaction solution was stirred at room temperature for 18 hours. The reaction was quenched by addition of saturated NH<sub>4</sub>Cl and the reaction mixture was extracted with ethyl acetate. The combined organic phase was dried over anhydrous MgSO<sub>4</sub>, filtered and the solvents were evaporated. The product **5a** was purified with flash column chromatography (light petroleum : ethyl acetate = 40 : 1) to give a transparent oil (yield 19 %).

The other diethyl 2-methyl-2-alkenyl malonates **5b-d** were synthesized via methylation with sodium ethoxide as a base. Sodium ethoxide was generated by dropwise addition of ethanol (30 mL) to sodium (20 mmol) at 4°C with stirring for 1 hour. 10-13 mmol of **4b-d** were added, and after 30 min stirring on ice 1.3 mol-eq. iodomethane were applied for the reaction system. The reaction system was gradually warmed to room temperature and stirred for 18 hours. After the addition of saturated NaHCO<sub>3</sub>, the reaction products were extracted by ethyl acetate. The combined organic phase was dried over anhydrous MgSO<sub>4</sub>, filtered and solvents evaporated. The products **5b-d** were purified by flash column chromatography (light petroleum : ethyl acetate = 40 : 1) to give transparent oils in yields of 20-23 %.

2-methyl-2-alkenylmalonic acids **1** were synthesized according to literature procedure.<sup>1,2</sup> To a solution of substrates **5** (1-3.5 mmol) in 20 ml of ethanol, 10 ml of 8 M NaOH was added dropwise to the reaction system at 4°C. Afterwards, the reaction system was gradually warmed to room temperature and stirred for 18 hours. The reaction solution was neutralized by addition of 37 % HCl and ethanol was evaporated. After acidification with 2 M HCl, the carboxylates were extracted by ethyl acetate. The products **1** were crystallized as white solids using light petroleum and *tert*-butyl methyl ether (yield 72-86 %).

2-methyl-2-vinylmalonic acid (**1a**): <sup>1</sup>H NMR (200 MHz, dimethyl sulfoxide d<sub>6</sub>) δ 6.36-6.10 (m, 1H), 5.28-5.01 (m, 2H), 1.40 (s, 3H). <sup>13</sup>C NMR (50 MHz, dimethyl sulfoxide d<sub>6</sub>) δ 172.1, 137.3, 114.9, 55.5, 19.1.

2-methyl-2-(prop-1-enyl)malonic acid (**1b**): <sup>1</sup>H NMR (200 MHz, dimethylsulfoxide d<sub>6</sub>) δ 5.92-5.76 (m, 1H), 5.63-5.41 (m, 1H), 1.68 (dd, *J* = 6.4, 1.6 Hz, 3H), 1.36 (s, 3H). <sup>13</sup>C NMR (50 MHz, dimethyl sulfoxide d<sub>6</sub>) δ 172.5, 130.2, 124.9, 54.7, 19.8, 17.8.

2-methyl-2-(2'-methylprop-1'-enyl)malonic acid (**1c**): <sup>1</sup>H NMR (200 MHz, dimethylsulfoxide d6) δ 5.76-5.64 (m, 1H), 1.68 (s, 3H), 1.54 (s, 3H), 1.39 (s, 3H). <sup>13</sup>C NMR (50 MHz, dimethyl sulfoxide d6) δ 173.1, 133.8, 124.3, 53.3, 26.7, 22.6, 18.1.

2-methyl-2-(but-1-enyl)malonic acid (**1d**): <sup>1</sup>H NMR (200 MHz, dimethylsulfoxide d6) δ 5.98-5.78 (m, 1H), 5.68-5.47 (m, 1H), 2.16-1.96 (m, 2H), 1.39 (s, 3H), 0.97 (t, *J* = 7.4 Hz, 3H). <sup>13</sup>C NMR (50 MHz, dimethyl sulfoxide d6) δ 172.6, 131.6, 128.2, 54.6, 25.0, 19.9, 13.3.

#### Semi-preparative enzymatic decarboxylation of alkenyl substrates **1a-d**

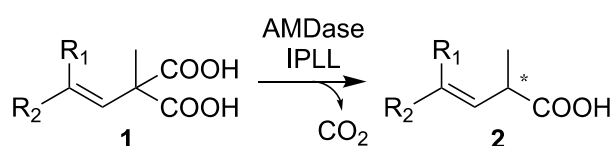

- a) R<sub>1</sub> = H    R<sub>2</sub> = H        c) R<sub>1</sub> = CH<sub>3</sub>    R<sub>2</sub> = CH<sub>3</sub>  
 b) R<sub>1</sub> = H    R<sub>2</sub> = CH<sub>3</sub>      d) R<sub>1</sub> = H        R<sub>2</sub> = C<sub>2</sub>H<sub>5</sub>

0.4 mmol of 2-methyl-2-alkenylmalonates **1** were dissolved in 40 ml of 50 mM Tris-HCl buffer (pH 8.0 at 30°C) containing 10 %v/v of the crude extract of AMDase variants (ca. 75 mg wetted cell pellet/mL). The biocatalysis was performed at 30°C. After full conversion of substrate **1** was confirmed by thin-layer chromatography (TLC) control, 2 M HCl was added to the reaction solution and the products were extracted by ethyl acetate. The combined organic phases were dried over anhydrous MgSO<sub>4</sub> and evaporated. The products **2** were isolated by flash column chromatography (light petroleum : ethyl acetate = 10:1) in 50-98 % yield.

2-methylbut-3-enoic acid (**2a**): <sup>1</sup>H NMR (200 MHz, acetone d6) δ 6.13-5.81 (m, 1H), 5.26-4.98 (m, 2H), 3.24-3.02 (m, 1H), 1.21 (d, *J* = 7.0 Hz, 3H). <sup>13</sup>C NMR (50 MHz, acetone d6) δ 175.4, 138.9, 116.0, 44.1, 17.1.

(*E*)-2-methylpent-3-enoic acid (**2b**): <sup>1</sup>H NMR (200 MHz, acetone d6) δ 5.71-5.45 (m, 2H), 3.18-2.95 (m, 1H), 1.68-1.60 (m, 3H), 1.21 (d, *J* = 7.0 Hz, 3H). <sup>13</sup>C NMR (50 MHz, acetone d6) δ 175.86, 131.6, 126.7, 43.2, 18.0, 17.8.

2,4-dimethylpent-3-enoic acid (**2c**): <sup>1</sup>H NMR (200 MHz, acetone d6) δ 5.22-5.07 (m, 1H), 3.41-3.20 (m, 1H), 1.72-1.63 (m, 6H), 1.14 (d, *J* = 7.0 Hz, 3H). <sup>13</sup>C NMR (50 MHz, acetone d6) δ 176.3, 133.9, 125.4, 39.3, 25.8, 18.4, 18.0.

(*E*)-2-methylhex-3-enoic acid (**2d**): <sup>1</sup>H NMR (200 MHz, dimethylsulfoxide d6) δ 5.78-5.28 (m, 2H), 3.15-2.87 (m, 1H), 2.18-1.83 (m, 2H), 1.13 (d, *J* = 7.0 Hz, 3H), 0.95 (t, *J* = 7.4 Hz, 3H). <sup>13</sup>C NMR (50 MHz, dimethyl sulfoxide d6) δ 175.6, 132.4, 128.5, 41.9, 24.8, 17.2, 13.4.

| Table S1. Specific activity of AMDase wild-type and its variants towards <b>1</b> |                                          |            |                |                |
|-----------------------------------------------------------------------------------|------------------------------------------|------------|----------------|----------------|
|                                                                                   | Specific activity (U mg <sup>-1</sup> )* |            |                |                |
|                                                                                   | Wild-type                                | IPLL       | CLG            | CLGIPL         |
| <b>1a</b>                                                                         | 2.1 ± 0.74                               | 7.2 ± 0.50 | 0.092 ± 0.022  | 0.29 ± 0.039   |
| <b>1b</b>                                                                         | 1.6 ± 0.25                               | 11 ± 0.78  | 0.095 ± 0.023  | 0.16 ± 0.045   |
| <b>1c</b>                                                                         | 0.16 ± 0.033                             | 1.2 ± 0.10 | 0.012 ± 0.0031 | 0.031 ± 0.0045 |
| <b>1d</b>                                                                         | 0.13 ± 0.048                             | 1.3 ± 0.12 | 0.013 ± 0.0045 | 0.025 ± 0.0089 |
| *: U = μmol min <sup>-1</sup>                                                     |                                          |            |                |                |

# Compound Analytics: $^1\text{H}$ -NMR data

## 1a

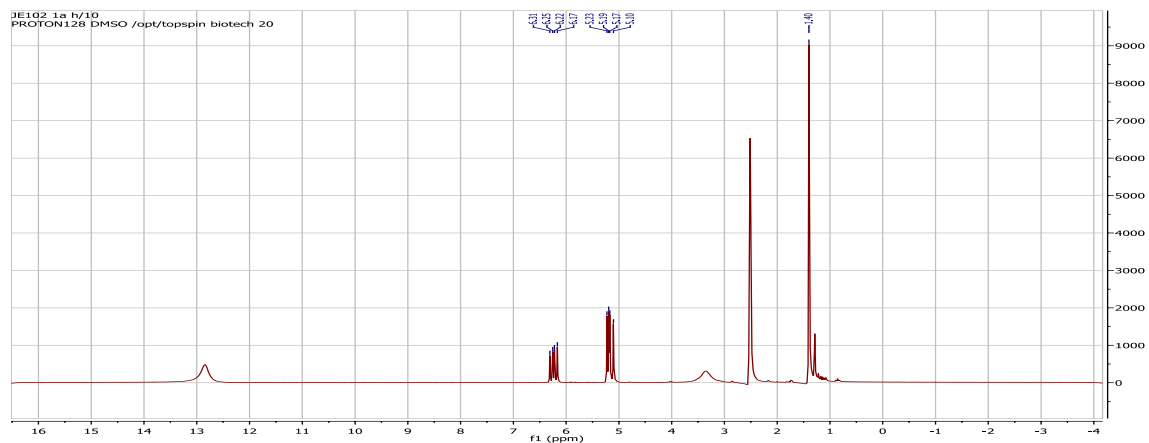

## 1b

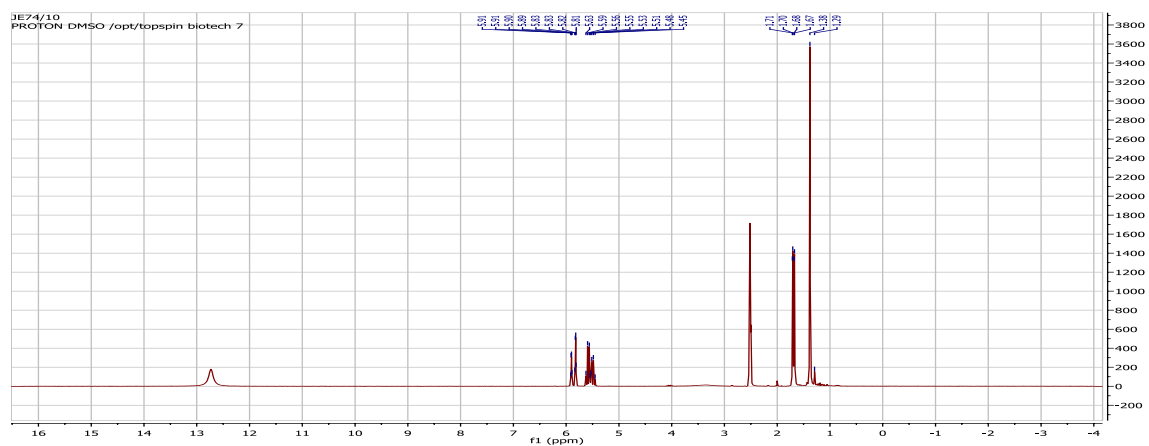

## 1c

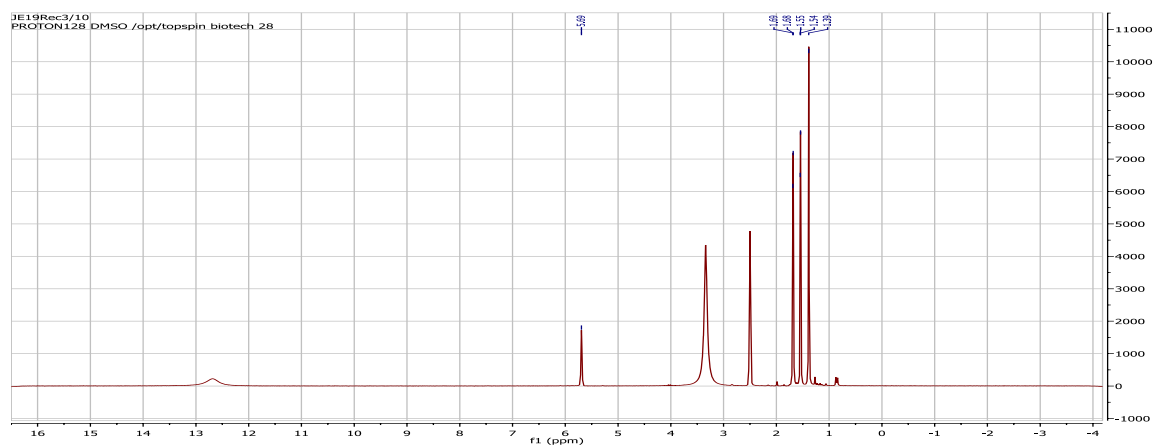

1d

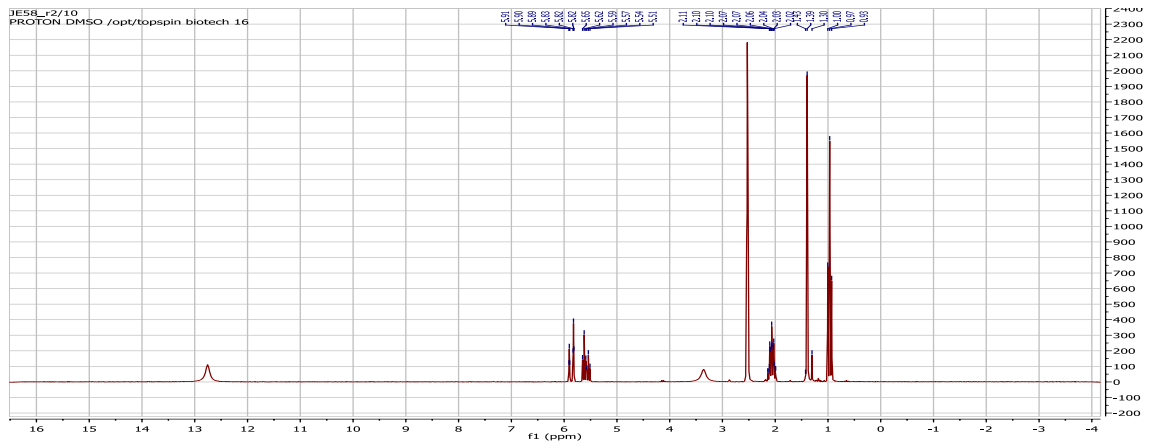

2a

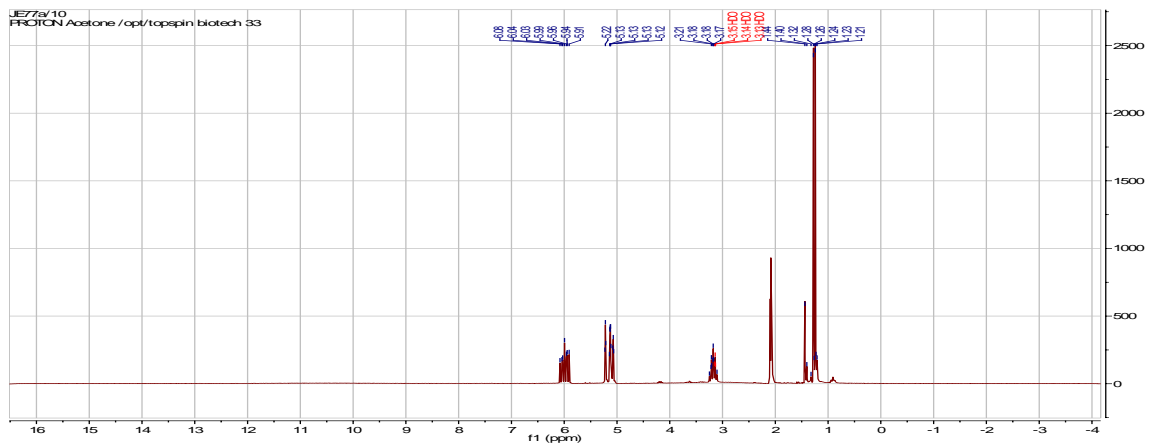

2b

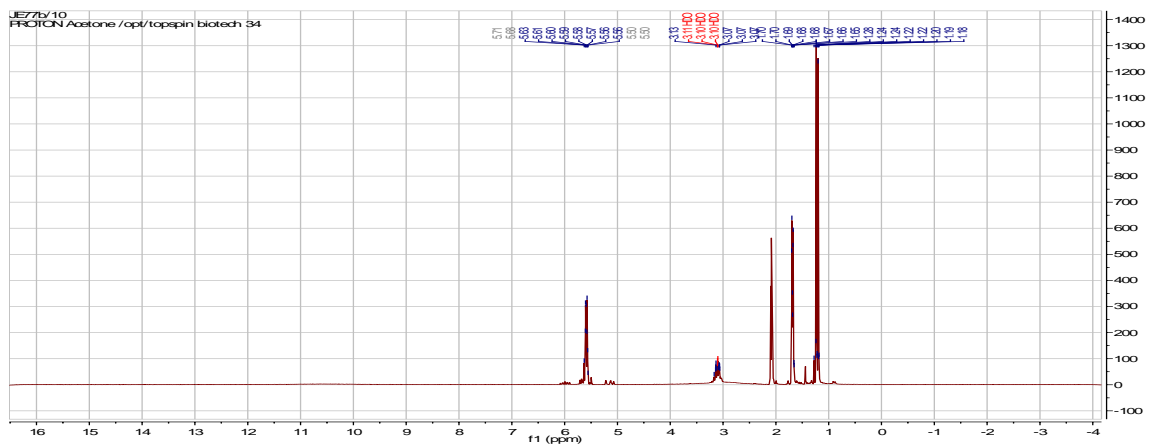



2c

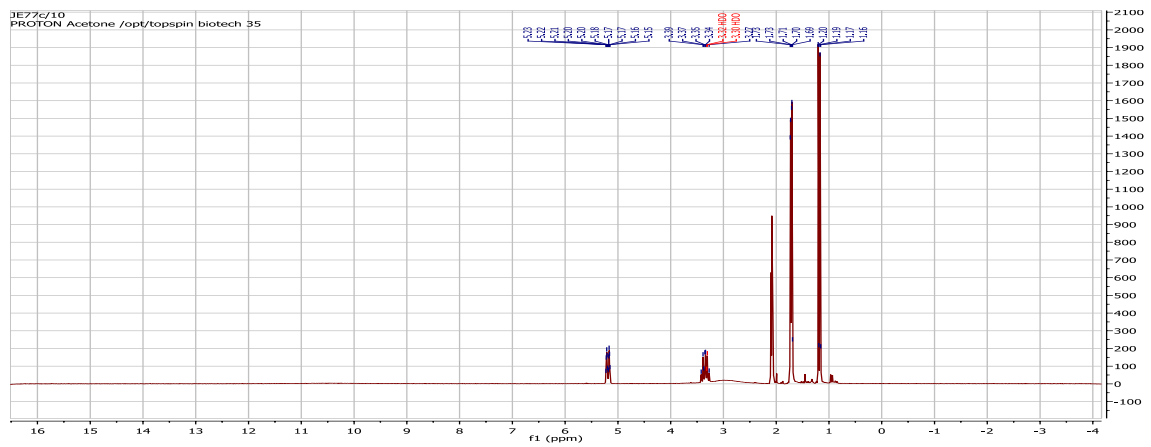

2d

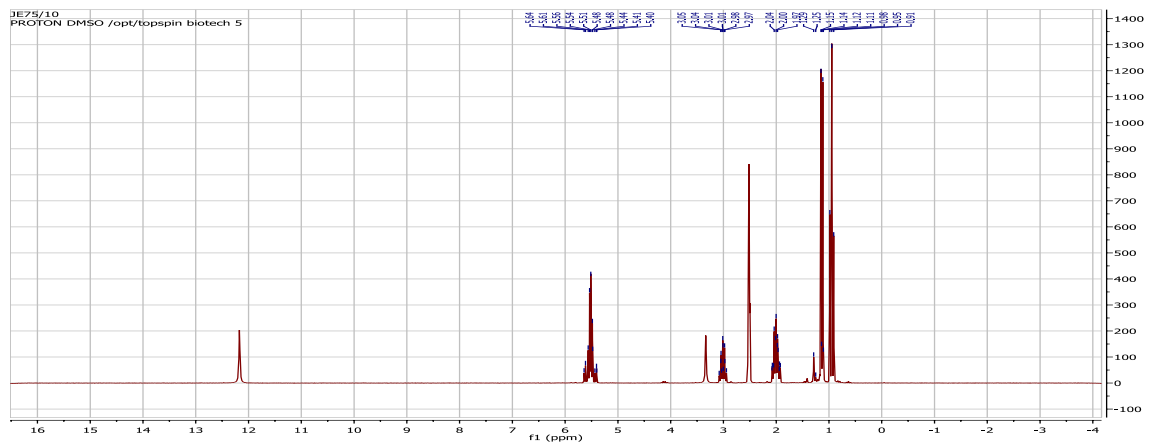

3a

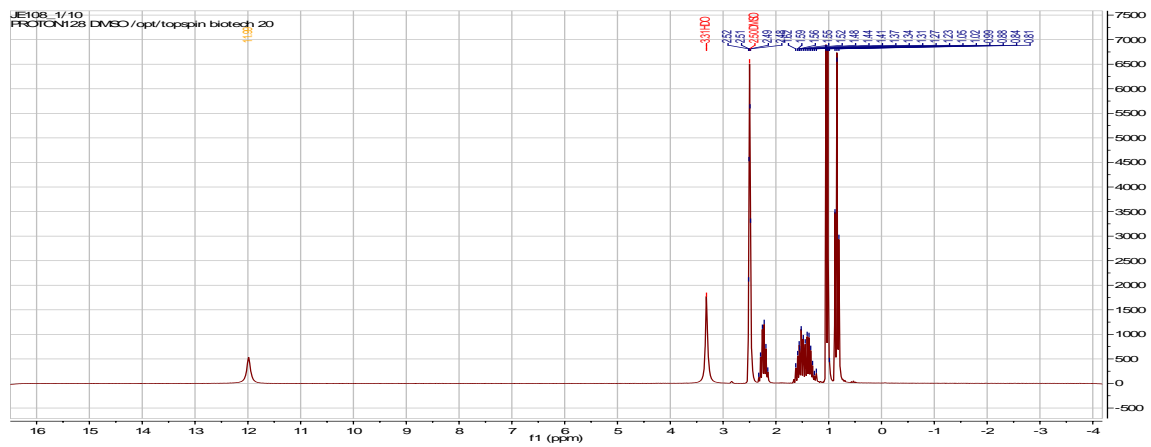

# Compound Analytics: $^{13}\text{C}$ -NMR data

## 1a

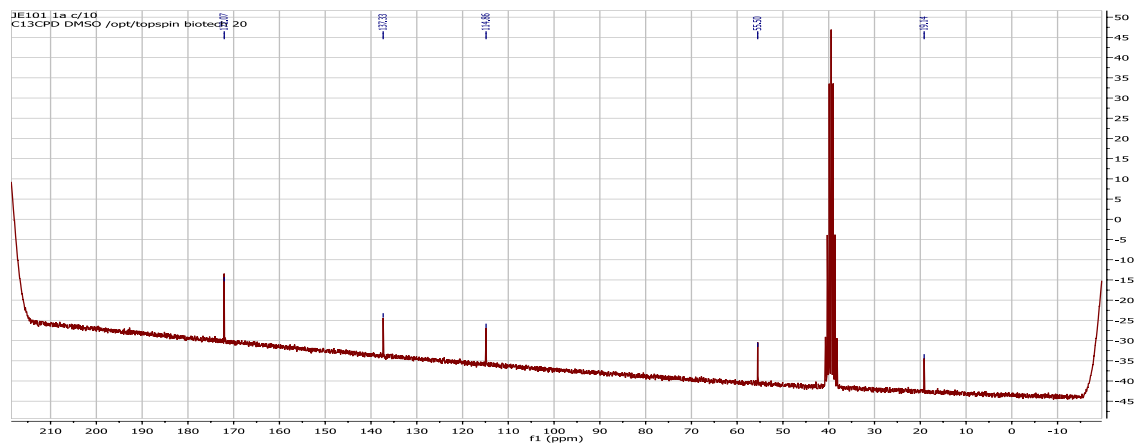

## 1b

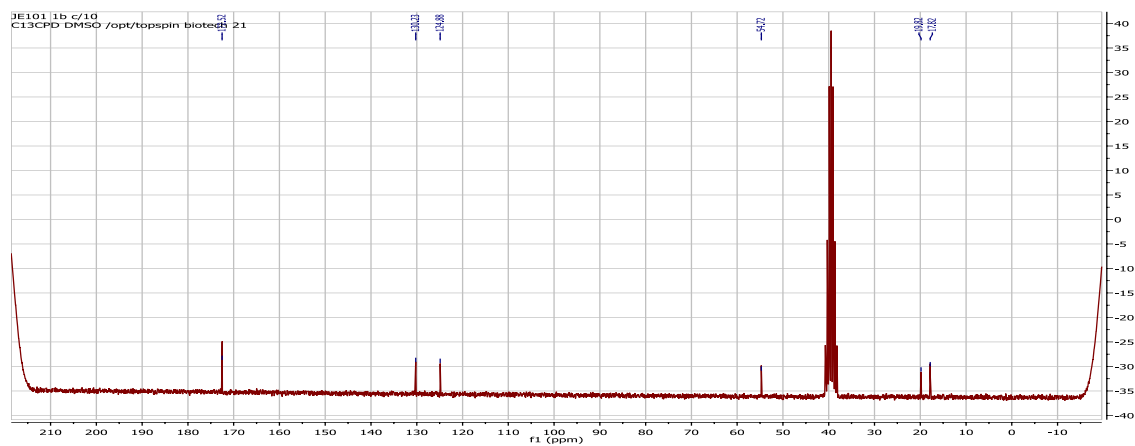

## 1c

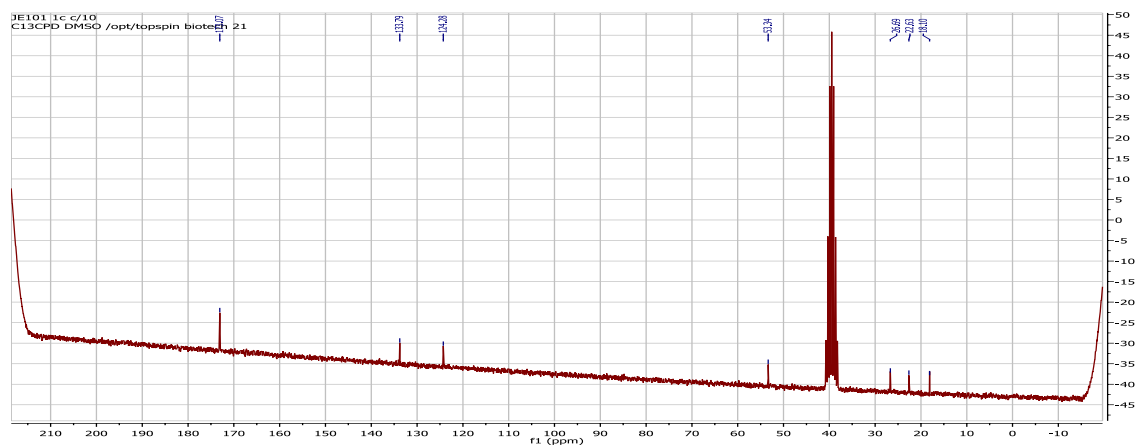

1d

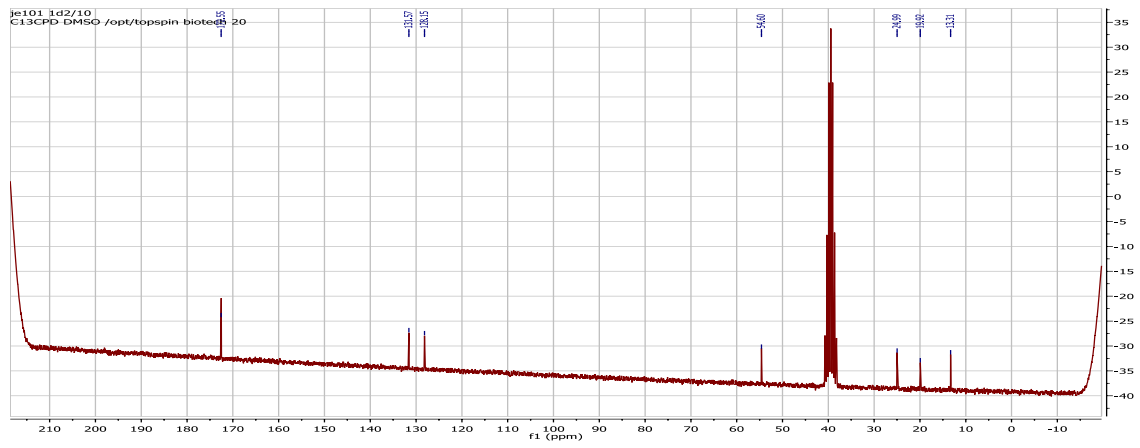

2a

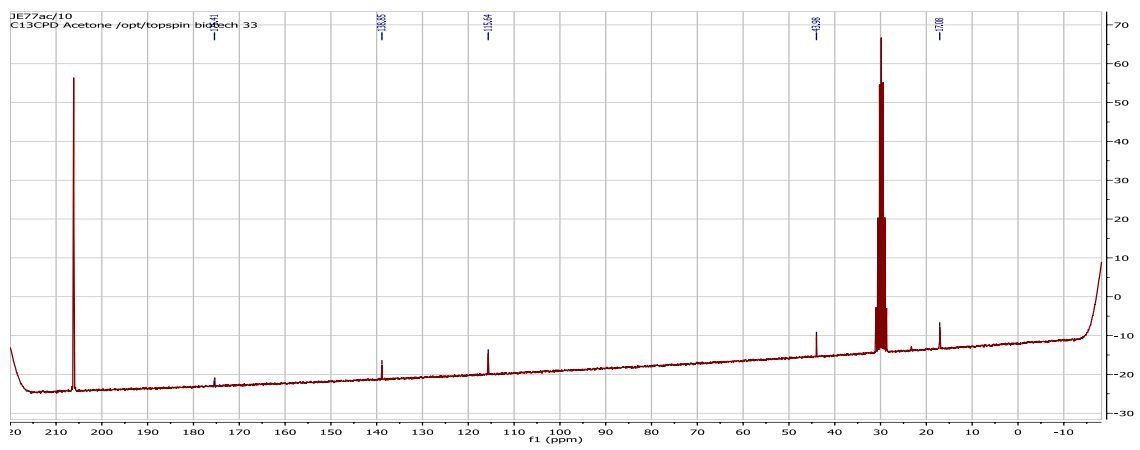

2b

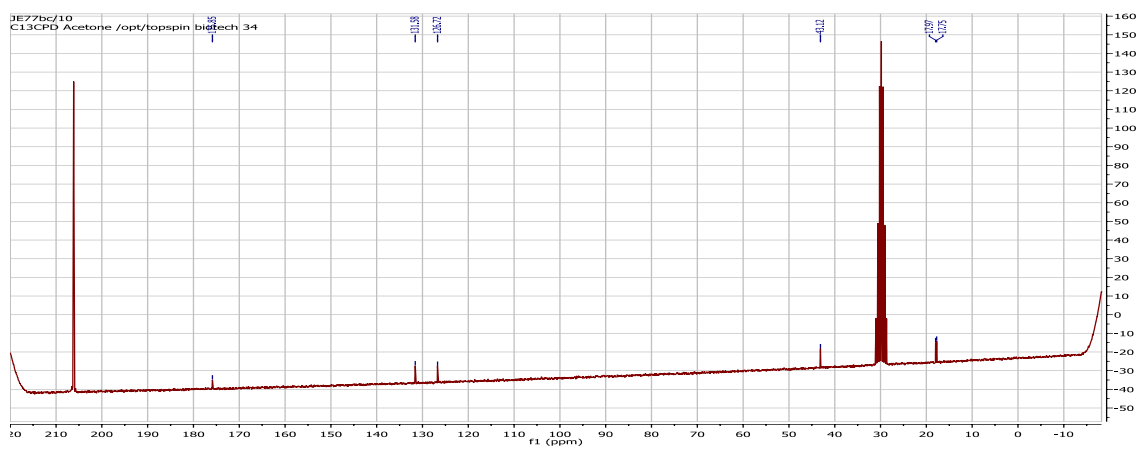

2c

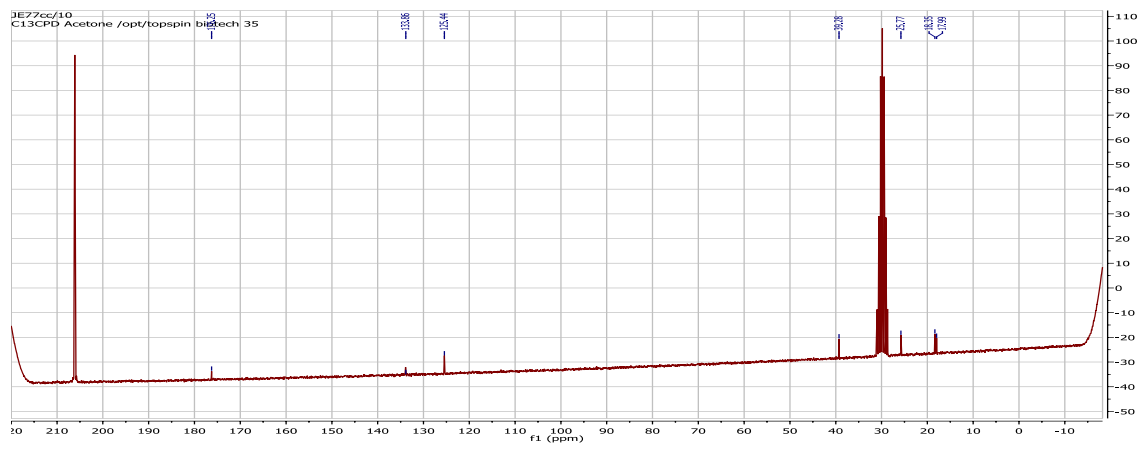

2d

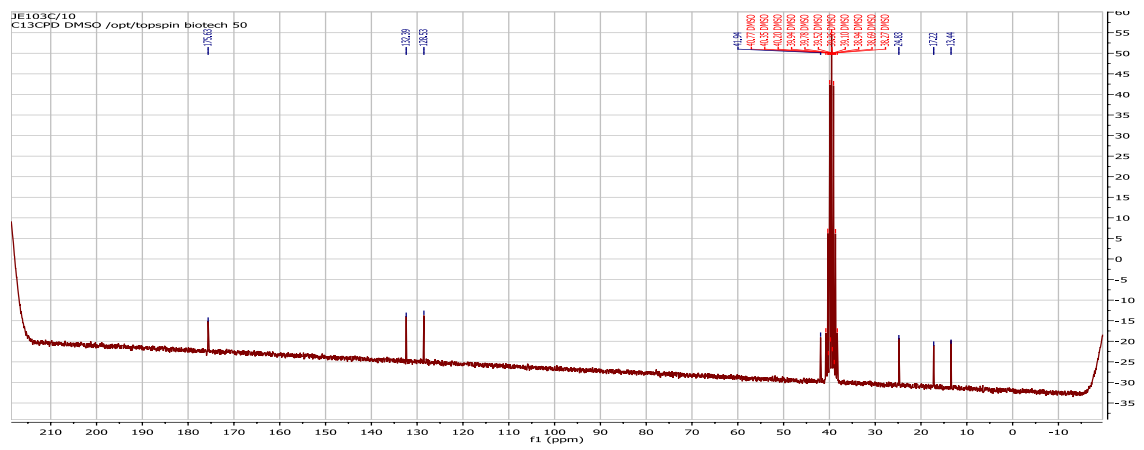

3a (The <sup>13</sup>C-NMR spectra was obtained from attached proton test (APT))

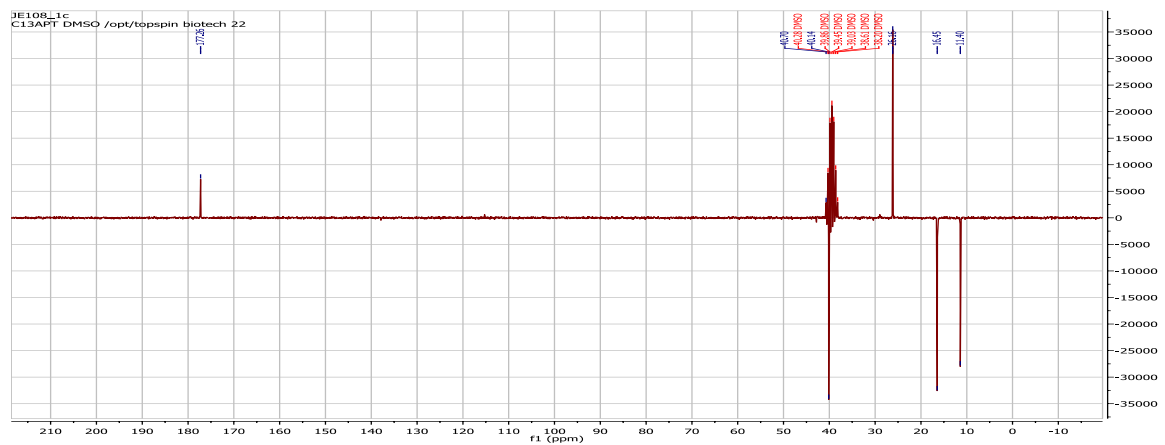

## Compound analytics: Chiral GC-FID chromatogram

### 2a

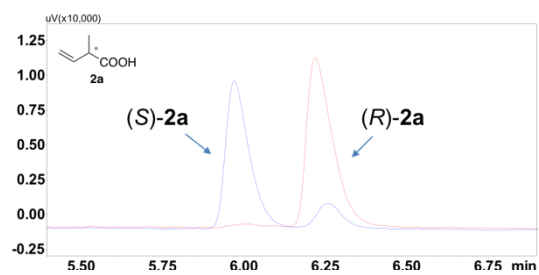

### 2b

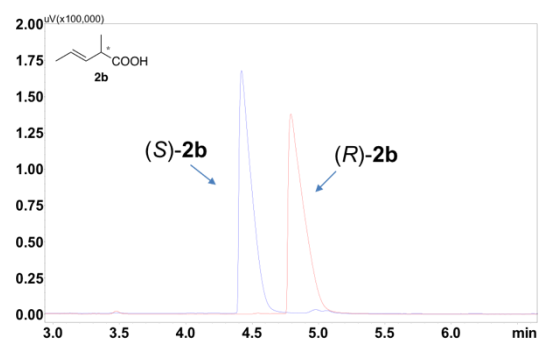

### 2c

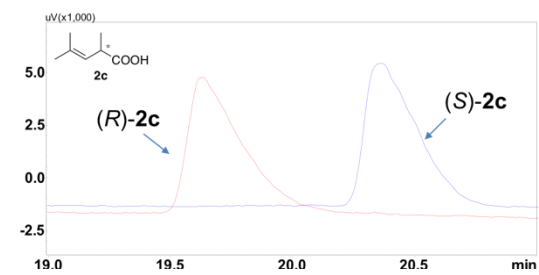

### 2d

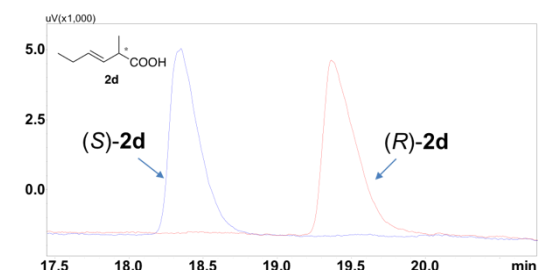

### 3a

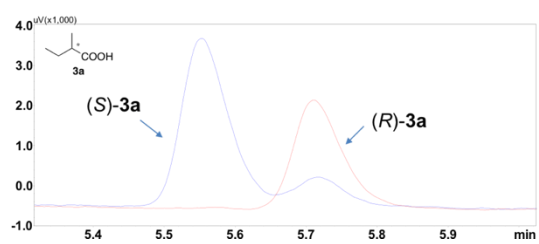

### 3b

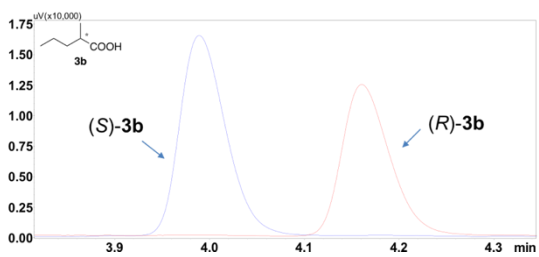

### 3c

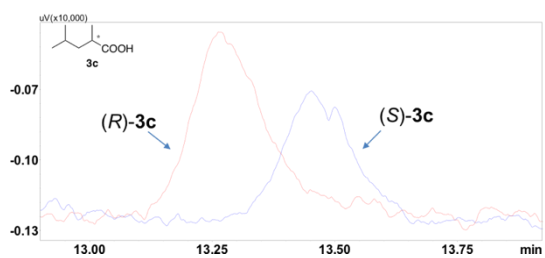

### 3d

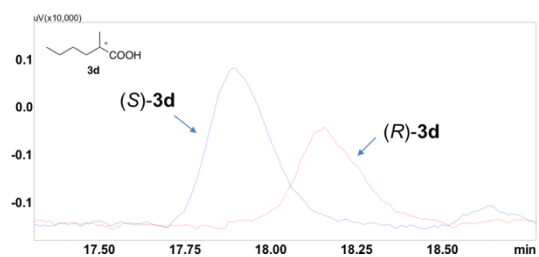

## References

- (1) Okrasa, K.; Levy, C.; Wilding, M.; Goodall, M.; Baudendistel, N.; Hauer, B.; Leys, D.; Micklefield, J. Structure-Guided Directed Evolution of Alkenyl and Arylmalonate Decarboxylases. *Angew. Chem. Int. Ed.* **2009**, *48* (41), 7691–7694.
- (2) Miyamoto, K.; Ohta, H. Asymmetric Decarboxylation of Disubstituted Malonic Acid by *Alcaligenes Bronchisepticus* KU 1201. *Biocatalysis* **1991**, *5* (1), 49–60.
